# Supplementary material
Source: Springer Nature journal article supplement (https://www.springermedizin.de/resource/supplementary/12955_2008_457_MOESM1_ESM.pdf/9560498)
Supplement: MOESM1 [file 9560498]

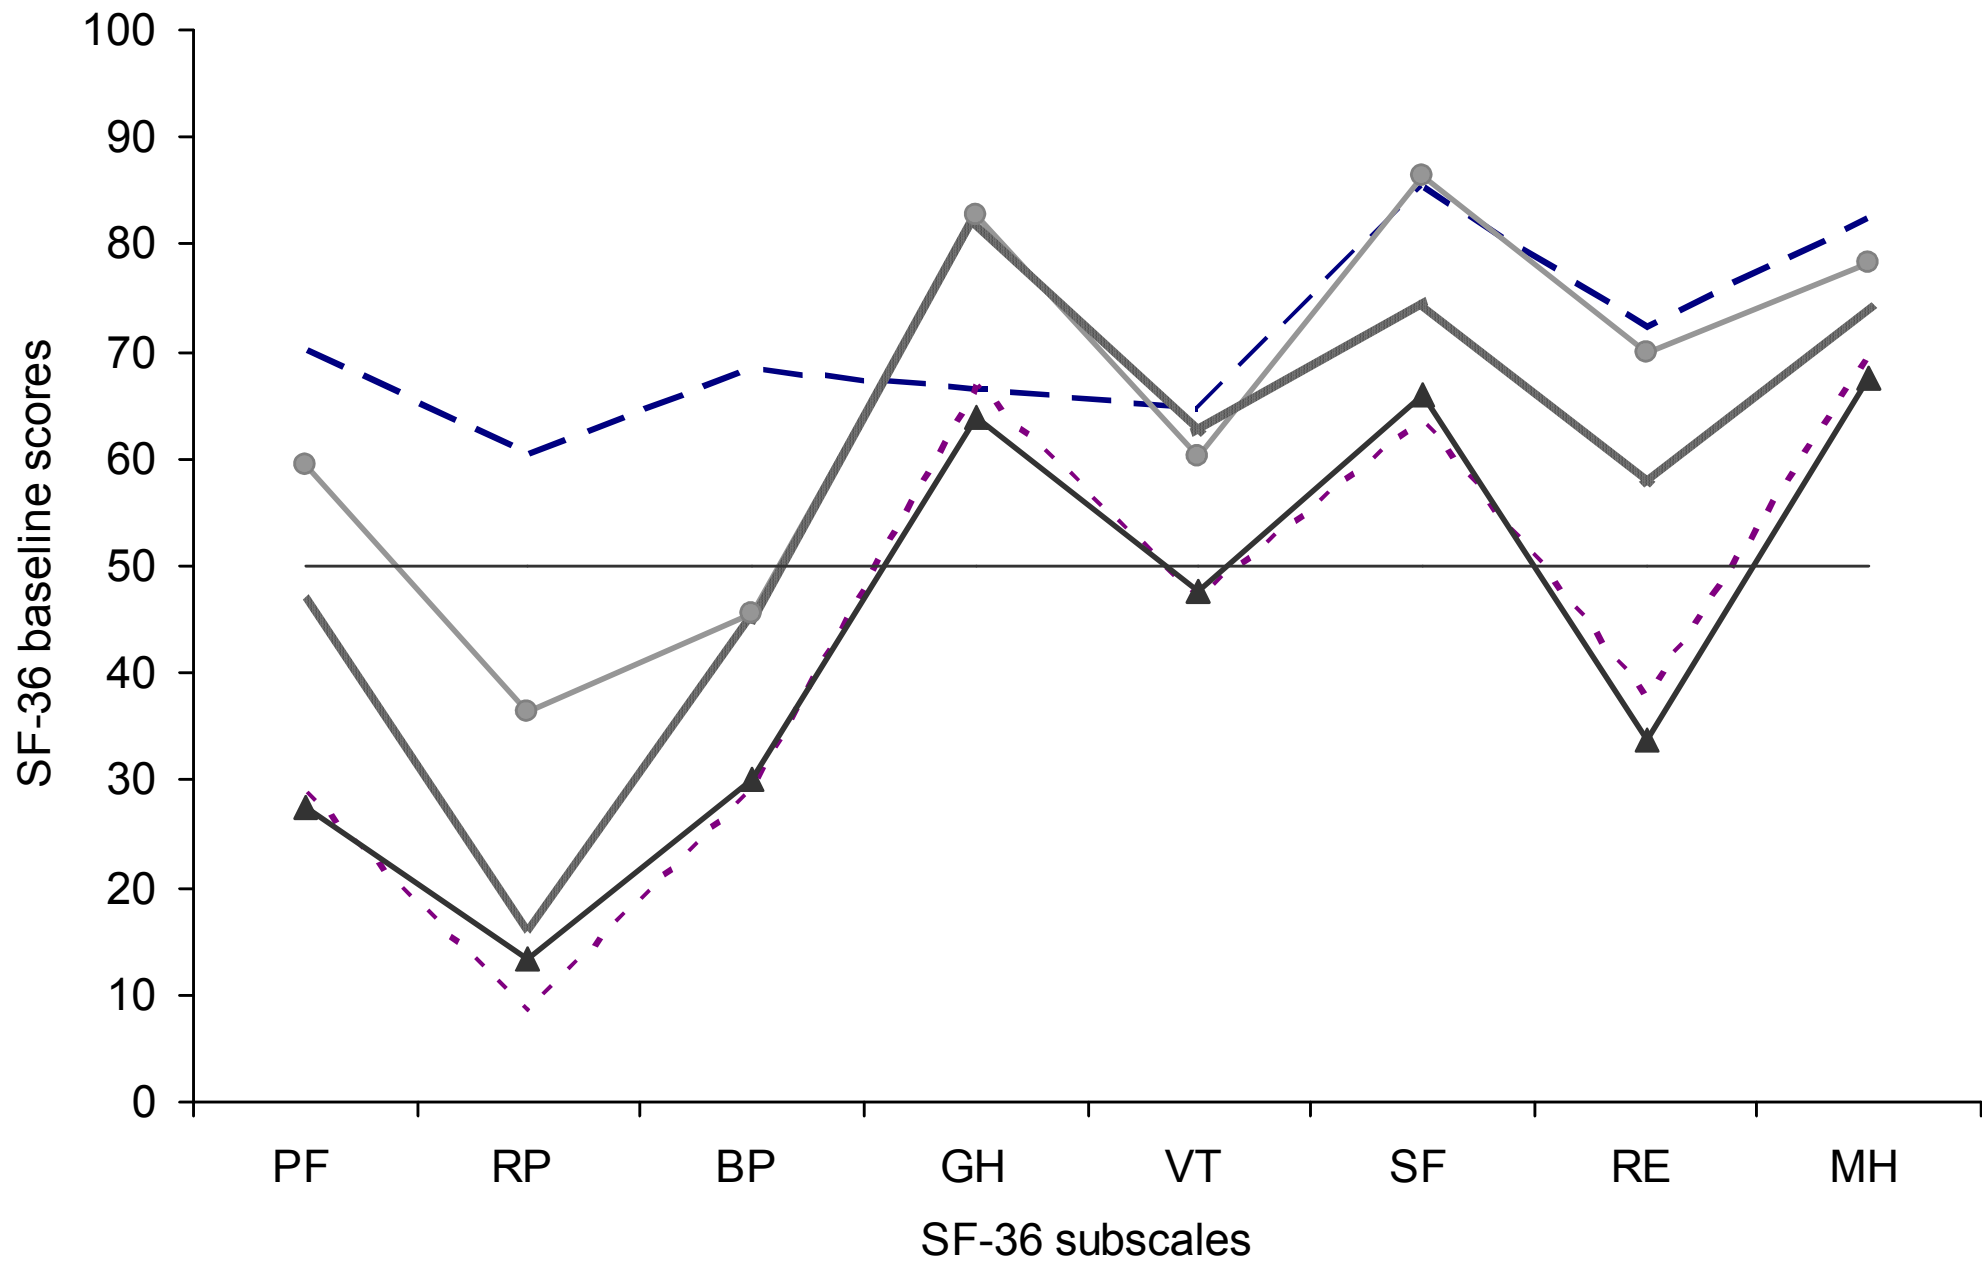

- - - Total hip replacement (controls)
- - - Total hip replacement (patients)
- ▲— Total knee replacement
- Arthroscopic partial meniscectomy
- Anterior cruciate ligament reconstruction
- Subscales midpoint
